# Supplementary material for: Structural Basis of Clostridium perfringens Enterotoxin Activation and Oligomerization by Trypsin
Source: MDPI journal article supplement (doi:10.3390/toxins15110637), 2023-10-31
Supplement: s1 [file s1]

---

Supplementary Information for

# Structural Basis of *Clostridium perfringens* Enterotoxin Activation and Oligomerization by Trypsin

Chinemerem P. Ogbu<sup>1,2</sup>, Srajan Kapoor<sup>1,2</sup>, and Alex J. Vecchio<sup>1,\*</sup>

1 Department of Structural Biology, University at Buffalo, The State University of New York, Buffalo, New York 14203, USA; ORCID 0000-0001-5663-7148, cpogbu@buffalo.edu (C.P.O); ORCID 0000-0003-1347-550X kapoorsrajan@gmail.com (S.K.); ORCID 0000-0002-4222-7874, vecchioa@buffalo.edu (A.J.V.)

2 Equal Contribution

\* Correspondence: vecchioa@buffalo.edu

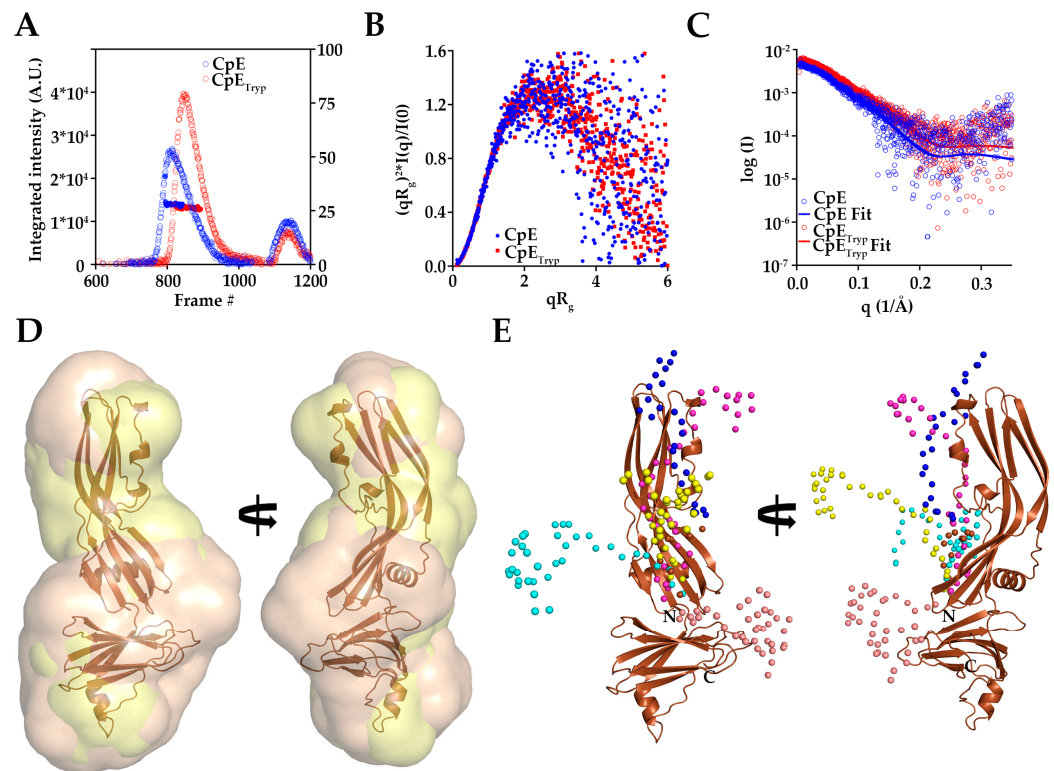

**Figure S1: Additional SEC-MALS SAXS results.** (A) Subtracted series plots showing integrated intensity  $I(0)$  (hollow circles) and  $R_g$  (filled circles) versus the frame number for the SEC-MALS-SAXS run for CpE (blue) and CpE<sub>Tryp</sub> (red). (B) dimensionless Kratky plot of CpE (Blue) and CpE<sub>Tryp</sub> (Red) shows that the protein is properly folded. (C) FoXS based fitting of a theoretical scattering profile of CpE (PDB ID: 2XH6) to the experimental SAXS profile of CpE (Blue) and CpE<sub>Tryp</sub> (Red). (D) Overlay of SAXS envelop of CpE (Wheat) and CpE<sub>Tryp</sub> (Yellow) and 2XH6. (E) EOM generated five different models of CpE residues 1-37 that were missing from the crystal structure [1,2]. Out of the five EOM generated models, one (blue spheres) showed the  $D_{\max}$  of  $\sim 103$  Å and  $R_g$  of  $\sim 27$  Å other models therefore this model was selected for further analysis. The  $D_{\max}$  and  $R_g$  for five different EOM generated models are given in Table S4.

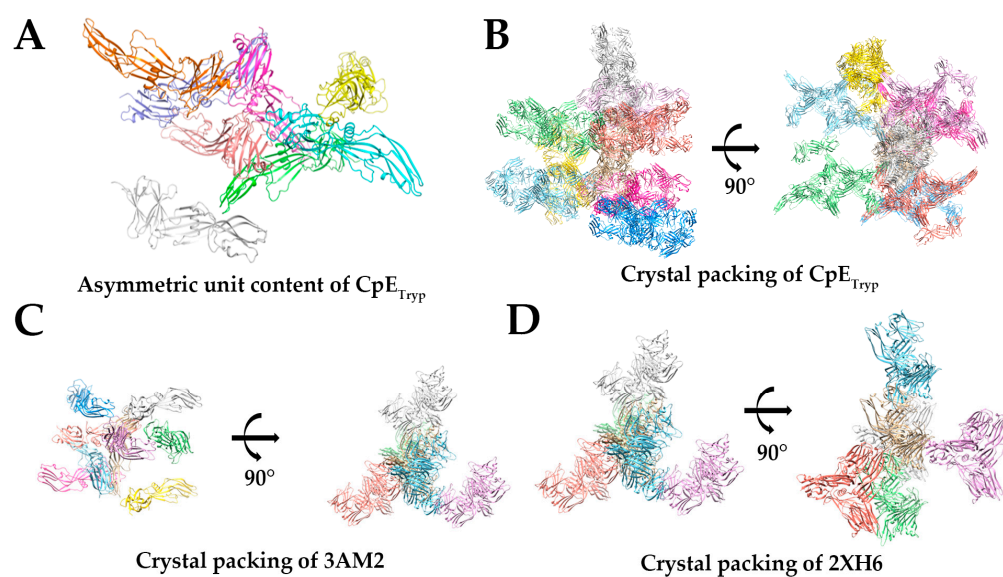

**Figure S2: Asymmetric Unit Content and Protein Packing of CpE Crystal Structures.** (A) Asymmetric unit of CpE<sub>Tryp</sub> with eight molecules each coloured independently. Crystal packing of (B) CpE<sub>Tryp</sub>, (C) PDB ID: 3AM2, and (D) PDB ID: 2XH6. Each monomer is coloured uniquely

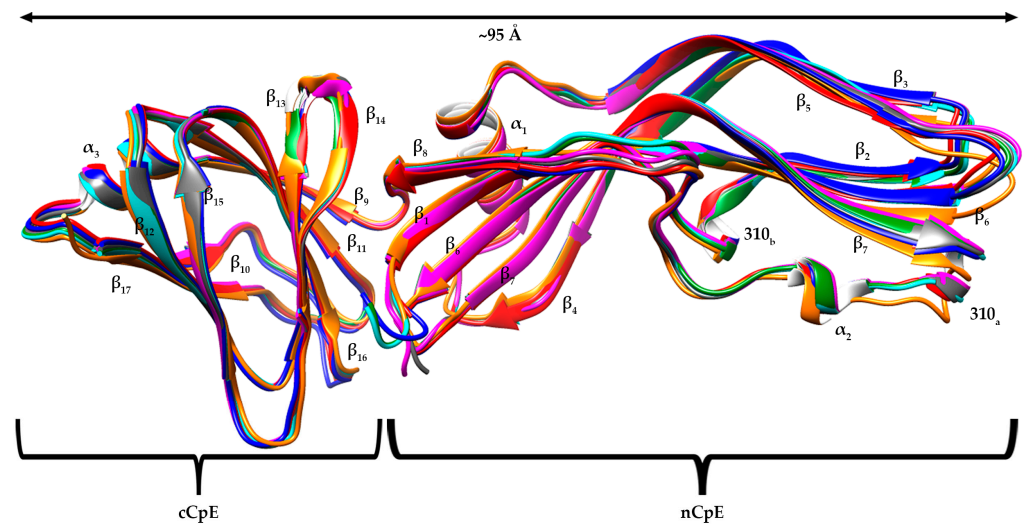

**Figure S3: Structure Comparison of CpE Monomers from Various Crystal Structures.** Structural overlay of CpE<sub>Tryp</sub> chain A (cyan) with those from PDB ID: 2XH6 (orange), 6YHJ (green), 3AM2 (red), 3ZIW (blue), and 4P5H (magenta). CpE is shown as a cartoon.

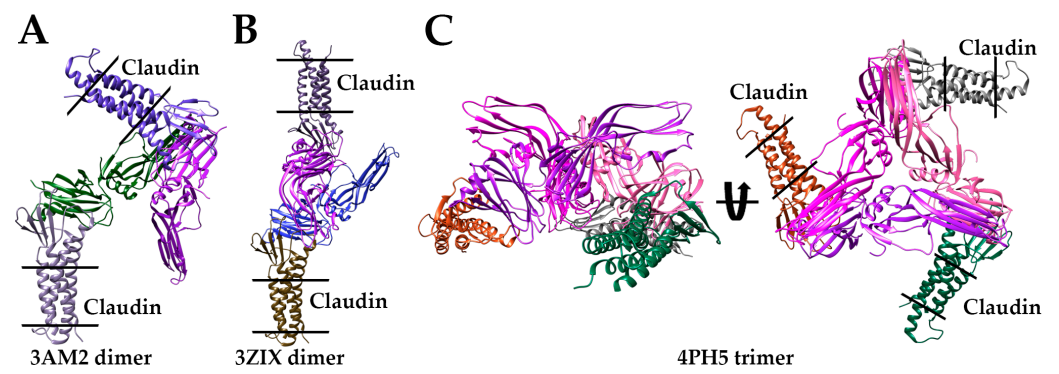

**Figure S4: Models of Previously Determined CpE Structures Bound to Claudins.** Superpositioning of claudins onto the dimer from PDB ID: 3AM2 (left), 3ZIX (middle), and trimer from 4PH5 (right) shows that claudins are not primed in physiologically relevant poses.

Table S1. List of unique peptides identified by mass spectrometry for CpE and CpE<sub>Tryp</sub>

| Unique peptide number | Unique peptides                  | Peptide count CpE | Peptide count CpE <sub>Tryp</sub> |
|-----------------------|----------------------------------|-------------------|-----------------------------------|
| 1                     | MLSNNLNPM                        | 2                 | 0                                 |
| 2                     | MLSNNLNPMVFEN                    | 4                 | 0                                 |
| 3                     | MLSNNLNPMVFENAK                  | 292               | 22                                |
| 4                     | LSNNLNPMVFENAK                   | 8                 | 0                                 |
| 5                     | SNNLNPMVFENAK                    | 15                | 0                                 |
| 6                     | NNLNPMVFENAK                     | 72                | 2                                 |
| 7                     | NLNPMVFENAK                      | 25                | 1                                 |
| 8                     | LNPMVFENAK                       | 11                | 0                                 |
| 9                     | NPMVFENAK                        | 4                 | 0                                 |
| 10                    | PMVFENAK                         | 22                | 0                                 |
| 11                    | ENAKEVFLISEDLK                   | 1                 | 0                                 |
| 12                    | AKEVFLISEDLK                     | 4                 | 0                                 |
| 13                    | KEVFLISEDLK                      | 2                 | 0                                 |
| 14                    | EVFLISEDLK                       | 137               | 9                                 |
| 15                    | EVFLISEDLKTPINITNSNSNLS DGLYVIDK | 1                 | 0                                 |
| 16                    | VFLISEDLK                        | 2                 | 0                                 |
| 17                    | FLISEDLK                         | 7                 | 0                                 |
| 18                    | LISEDLKTPINITNSNSNLS DGLYVIDK    | 1                 | 0                                 |
| 19                    | LKTPINITNSNSNLS DGLYVIDK         | 1                 | 0                                 |
| 20                    | KTPINITNSNSNLS DGLYVIDK          | 0                 | 2                                 |
| 21                    | TPINITNSN                        | 7                 | 6                                 |
| 22                    | TPINITNSNS                       | 1                 | 1                                 |
| 23                    | TPINITNSNSN                      | 8                 | 7                                 |
| 24                    | TPINITNSNSNL                     | 2                 | 2                                 |
| 25                    | TPINITNSNSNLS                    | 1                 | 1                                 |
| 26                    | TPINITNSNSNLS D                  | 4                 | 3                                 |
| 27                    | TPINITNSNSNLS DGL                | 1                 | 1                                 |
| 28                    | TPINITNSNSNLS DGL                | 1                 | 2                                 |
| 29                    | TPINITNSNSNLS DGLY               | 0                 | 1                                 |
| 30                    | TPINITNSNSNLS DGLYVIDK           | 121               | 133                               |
| 31                    | TPINITNSNSNLS DGLYVIDKGD         | 2                 | 2                                 |
| 32                    | TPINITNSNSNLS DGLYVIDKGDG        | 1                 | 3                                 |
| 33                    | PINITNSNSNLS DGLYVIDK            | 3                 | 4                                 |
| 34                    | INITNSNSNLS DGLYVIDK             | 4                 | 6                                 |
| 35                    | NITNSNSNLS DGLYVIDK              | 8                 | 6                                 |
| 36                    | ITNSNSNLS DGLYVIDK               | 9                 | 11                                |
| 37                    | TNSNSNLS DGLYVIDK                | 2                 | 2                                 |
| 38                    | NSNSNLS DGLYVIDK                 | 7                 | 10                                |
| 39                    | SNSNLS DGLYVIDK                  | 15                | 18                                |
| 40                    | NSNLS DGLYVIDK                   | 3                 | 4                                 |
| 41                    | SNLS DGLYVIDK                    | 5                 | 9                                 |
| 42                    | NLS DGLYVIDK                     | 1                 | 2                                 |
| 43                    | LS DGLYVIDK                      | 8                 | 7                                 |
| 44                    | SDGLYVIDK                        | 1                 | 2                                 |
| 45                    | DGLYVIDK                         | 1                 | 1                                 |
| 46                    | GDGWILGEPS                       | 1                 | 1                                 |
| 47                    | GDGWILGEPSVSSQILNPNETGTFSQSLTK   | 5                 | 1                                 |
| 48                    | GEPSVSSQILNPNETGTFSQSLTK         | 4                 | 4                                 |
| 49                    | EPSVSSQILNPNETGTFSQSLTK          | 1                 | 2                                 |
| 50                    | PSVSSQILNPNETGTFSQSLTK           | 2                 | 1                                 |
| 51                    | SVVSSQILNPNETGTFSQSLTK           | 1                 | 1                                 |
| 52                    | VVSSQILNPNETGTFSQSLTK            | 7                 | 9                                 |
| 53                    | SSQILNPNETGTFSQSLTK              | 0                 | 2                                 |
| 54                    | SQILNPNETGTFSQSLTK               | 3                 | 4                                 |
| 55                    | QILNPNETGTFSQSLTK                | 4                 | 4                                 |
| 56                    | ILNPNETGTFSQSLTK                 | 8                 | 9                                 |
| 57                    | NPNETGTFSQSLTK                   | 2                 | 3                                 |
| 58                    | PNETGTFSQSLTK                    | 8                 | 7                                 |
| 59                    | NETGTFSQSLTK                     | 2                 | 2                                 |
| 60                    | ETGTFSQSLTK                      | 5                 | 4                                 |
| 61                    | TGTFSQSLTK                       | 2                 | 1                                 |
| 62                    | GTFSQSLTK                        | 2                 | 2                                 |
| 63                    | TFSQSLTK                         | 3                 | 3                                 |
| 64                    | SKEVSINVN                        | 1                 | 1                                 |
| 65                    | FGITIGEONTIER                    | 1                 | 1                                 |

|     |                                  |     |     |
|-----|----------------------------------|-----|-----|
| 66  | ITIGEQNTIER                      | 1   | 2   |
| 67  | IGEQNTIER                        | 1   | 1   |
| 68  | SVSTTAGPN                        | 1   | 1   |
| 69  | SVSTTAGPNEY                      | 1   | 1   |
| 70  | SVSTTAGPNEYVYYK                  | 153 | 150 |
| 71  | SVSTTAGPNEYVYYKVYATYR            | 3   | 3   |
| 72  | SVSTTAGPNEYVYYKVYATYRK           | 6   | 7   |
| 73  | SVSTTAGPNEYVYYKVYATYRKYQAIR      | 3   | 5   |
| 74  | VSTTAGPNEYVYYK                   | 2   | 2   |
| 75  | STTAGPNEYVYYK                    | 2   | 5   |
| 76  | TTAGPNEYVYYK                     | 2   | 2   |
| 77  | TAGPNEYVYYK                      | 3   | 3   |
| 78  | AGPNEYVYYK                       | 4   | 5   |
| 79  | GPNEYVYYK                        | 1   | 1   |
| 80  | PNEYVYYK                         | 3   | 2   |
| 81  | RISHGNISDDGSIYK                  | 0   | 1   |
| 82  | ISHGNISD                         | 1   | 1   |
| 83  | ISHGNISDD                        | 1   | 2   |
| 84  | ISHGNISDDG                       | 1   | 1   |
| 85  | ISHGNISDDGS                      | 1   | 1   |
| 86  | ISHGNISDDGSIYK                   | 268 | 251 |
| 87  | ISHGNISDDGSIYKL                  | 1   | 1   |
| 88  | ISHGNISDDGSIYKLTGIWLSK           | 2   | 5   |
| 89  | SHGNISDDGSIYK                    | 4   | 3   |
| 90  | HGNISDDGSIYK                     | 6   | 7   |
| 91  | GNISDDGSIYK                      | 4   | 2   |
| 92  | NISDDGSIYK                       | 1   | 1   |
| 93  | ISDDGSIYK                        | 6   | 5   |
| 94  | SDDGSIYK                         | 3   | 2   |
| 95  | KLTGIWLSK                        | 1   | 1   |
| 96  | LTGIWLSK                         | 85  | 81  |
| 97  | LTGIWLSKTSADSLGNIDQGSLIETGER     | 2   | 2   |
| 98  | SKTSADSLGNIDQGSLIETGER           | 1   | 1   |
| 99  | KTSADSLGNIDQGSLIETGER            | 1   | 2   |
| 100 | TSADSLGNID                       | 1   | 1   |
| 101 | TSADSLGNIDQ                      | 2   | 1   |
| 102 | TSADSLGNIDQG                     | 1   | 3   |
| 103 | TSADSLGNIDQGS                    | 2   | 2   |
| 104 | TSADSLGNIDQGSLIE                 | 1   | 1   |
| 105 | TSADSLGNIDQGSLIET                | 1   | 2   |
| 106 | TSADSLGNIDQGSLIETG               | 2   | 2   |
| 107 | TSADSLGNIDQGSLIETGE              | 2   | 4   |
| 108 | TSADSLGNIDQGSLIETGER             | 136 | 160 |
| 109 | TSADSLGNIDQGSLIETGERCVLTVPSTDIEK | 2   | 3   |
| 110 | SADSLGNIDQGSLIETGER              | 2   | 3   |
| 111 | ADSLGNIDQGSLIETGER               | 0   | 4   |
| 112 | DSLGNIDQGSLIETGER                | 2   | 3   |
| 113 | SLGNIDQGSLIETGER                 | 7   | 5   |
| 114 | LGIDQGSLIETGER                   | 4   | 4   |
| 115 | GNIDQGSLIETGER                   | 3   | 5   |
| 116 | NIDQGSLIETGER                    | 6   | 7   |
| 117 | IDQGSLIETGER                     | 3   | 5   |
| 118 | DQGSLIETGER                      | 0   | 1   |
| 119 | QGSLIETGER                       | 4   | 4   |
| 120 | GSLIETGER                        | 2   | 2   |
| 121 | SLIETGER                         | 2   | 1   |
| 122 | CVLTVPSTDIEK                     | 22  | 27  |
| 123 | CVLTVPSTDIEKEILDAAAATER          | 60  | 50  |
| 124 | VLTVPSTDIEK                      | 2   | 2   |
| 125 | VLTVPSTDIEKEILDAAAATER           | 0   | 2   |
| 126 | LTVPSTDIEK                       | 1   | 0   |
| 127 | LTVPSTDIEKEILDAAAATER            | 3   | 0   |
| 128 | TVPSTDIEK                        | 5   | 3   |
| 129 | TVPSTDIEKEILDAAAATER             | 2   | 2   |
| 130 | PSTDIEKEILDAAAATER               | 3   | 2   |
| 131 | IEKEILDAAAATER                   | 2   | 0   |
| 132 | EKEILDAAAATER                    | 0   | 1   |
| 133 | KEILDAAAATER                     | 1   | 0   |

|     |                              |     |     |
|-----|------------------------------|-----|-----|
| 134 | EILDAAAATER                  | 50  | 68  |
| 135 | ILDAAAATER                   | 2   | 2   |
| 136 | LDAAAATER                    | 1   | 3   |
| 137 | DAAAATER                     | 1   | 1   |
| 138 | LNLTDALN                     | 0   | 1   |
| 139 | LNLTDALNSN                   | 3   | 4   |
| 140 | LNLTDALNSNPA                 | 2   | 2   |
| 141 | LNLTDALNSNPAG                | 2   | 3   |
| 142 | LNLTDALNSNPAGN               | 3   | 6   |
| 143 | LNLTDALNSNPAGNLYDWR          | 84  | 87  |
| 144 | NLTDALNSNPAGNLYDWR           | 2   | 4   |
| 145 | LTDALNSNPAGNLYDWR            | 4   | 8   |
| 146 | TDALNSNPAGNLYDWR             | 2   | 3   |
| 147 | DALNSNPAGNLYDWR              | 0   | 2   |
| 148 | ALNSNPAGNLYDWR               | 8   | 7   |
| 149 | LNSNPAGNLYDWR                | 1   | 2   |
| 150 | NSNPAGNLYDWR                 | 2   | 3   |
| 151 | SNPAGNLYDWR                  | 7   | 8   |
| 152 | NPAGNLYDWR                   | 2   | 2   |
| 153 | PAGNLYDWR                    | 11  | 13  |
| 154 | AGNLYDWR                     | 1   | 1   |
| 155 | RSSNYPWTQK                   | 1   | 2   |
| 156 | SSNYPWTQK                    | 160 | 191 |
| 157 | SSNYPWTQKLNHLTITATGQK        | 33  | 23  |
| 158 | SSNYPWTQKLNHLTITATGQKYR      | 17  | 15  |
| 159 | SSNYPWTQKLNHLTITATGQKYRILASK | 2   | 1   |
| 160 | SNSYPWTQK                    | 3   | 6   |
| 161 | NSYPWTQK                     | 3   | 4   |
| 162 | SYPWTQKLNHLTITATGQK          | 1   | 1   |
| 163 | TQKLNHLTITATGQK              | 0   | 1   |
| 164 | KLNHLTITATGQK                | 1   | 0   |
| 165 | LNLHLTIT                     | 1   | 1   |
| 166 | LNLHLTITAT                   | 1   | 1   |
| 167 | LNLHLTITATG                  | 1   | 1   |
| 168 | LNLHLTITATGQ                 | 1   | 0   |
| 169 | LNLHLTITATGQK                | 132 | 110 |
| 170 | LNLHLTITATGQKYR              | 9   | 6   |
| 171 | NLHLTITATGQK                 | 5   | 3   |
| 172 | LHLTITATGQK                  | 5   | 6   |
| 173 | HLTITATGQK                   | 3   | 1   |
| 174 | LTITATGQK                    | 2   | 2   |
| 175 | TITATGQK                     | 1   | 1   |
| 176 | YRILASKIVDFNIYSNNFNVLK       | 1   | 0   |
| 177 | IVDFNIYSNNFN                 | 0   | 1   |
| 178 | IVDFNIYSNNFNVLK              | 80  | 69  |
| 179 | FNIYSNNFNVLK                 | 2   | 3   |
| 180 | FNIYSNNFNVLKLEQSLGDGVK       | 0   | 1   |
| 181 | IYSNNFNVLK                   | 5   | 5   |
| 182 | SNNFNVLK                     | 6   | 6   |
| 183 | NNFNVLK                      | 4   | 2   |
| 184 | KLEQSLGDGVK                  | 2   | 2   |
| 185 | LEQSLGDGVK                   | 70  | 63  |
| 186 | LEQSLGDGVKD                  | 1   | 2   |
| 187 | LEQSLGDGVKDH                 | 3   | 2   |
| 188 | LEQSLGDGVKDHY                | 1   | 1   |
| 189 | LEQSLGDGVKDHYVD              | 2   | 0   |
| 190 | LEQSLGDGVKDHYVDI             | 0   | 1   |
| 191 | LEQSLGDGVKDHYVDISLDAG        | 1   | 0   |
| 192 | LEQSLGDGVKDHYVDISLDAGQY      | 1   | 1   |
| 193 | LEQSLGDGVKDHYVDISLDAGQYVLMK  | 61  | 49  |
| 194 | EQSLGDGVK                    | 1   | 1   |
| 195 | QSLGDGVK                     | 3   | 2   |
| 196 | SLGDGVKDHYVDISLDAGQYVLMK     | 3   | 2   |
| 197 | LGDGVKDHYVDISLDAGQYVLMK      | 1   | 1   |
| 198 | DGVKDHYVDISLDAGQYVLMK        | 4   | 2   |
| 199 | GVKDHYVDISLDAGQYVLMK         | 2   | 2   |
| 200 | VKDHYVDISLDAGQYVLMK          | 0   | 1   |
| 201 | DHYVDISL                     | 0   | 1   |



---

|     |                    |    |    |
|-----|--------------------|----|----|
| 202 | DHYVDISLD          | 1  | 1  |
| 203 | DHYVDISLDAG        | 1  | 1  |
| 204 | DHYVDISLDAGQY      | 2  | 1  |
| 205 | DHYVDISLDAGQYVLMK  | 58 | 38 |
| 206 | DHYVDISLDAGQYVLMKA | 0  | 1  |
| 207 | HYVDISLDAGQYVLMK   | 0  | 1  |
| 208 | ISLDAGQYVLMK       | 2  | 1  |
| 209 | AGQYVLMK           | 2  | 2  |
| 210 | GQYVLMK            | 1  | 1  |
| 211 | KANSSYSGNYPYSILFQK | 0  | 1  |
| 212 | ANSSYSGNYPY        | 1  | 0  |
| 213 | ANSSYSGNYPYSILFQK  | 89 | 88 |
| 214 | SSYSGNYPYSILFQK    | 11 | 16 |
| 215 | YSGNYPYSILFQK      | 0  | 2  |
| 216 | SGNYPYSILFQK       | 4  | 3  |
| 217 | GNYPYSILFQK        | 4  | 3  |
| 218 | NYPYSILFQK         | 1  | 1  |
| 219 | YPYSILFQK          | 7  | 9  |
| 220 | PYSILFQK           | 3  | 4  |

Table S2. SAXS Data Collection Statistics.

| Data collection parameters                        |                                                                                                      |                     |
|---------------------------------------------------|------------------------------------------------------------------------------------------------------|---------------------|
| Instrument                                        | BioCAT facility at the Advanced Photon Source beamline<br>18ID with Pilatus3 X 1M (Dectris) detector |                     |
| Experiment type                                   | SEC-MALS-SAXS                                                                                        |                     |
| Column                                            | Superdex 200 10/300 Increase (0.6 mL/min)                                                            |                     |
| Wavelength (Å)                                    | 1.033                                                                                                |                     |
| Detector distance (m)                             | 3.628                                                                                                |                     |
| q-measurement range (Å <sup>-1</sup> )            | 0.0045 – 0.35                                                                                        |                     |
| Exposure time (s)                                 | 0.5                                                                                                  |                     |
| Exposure period (s)                               | 2.0                                                                                                  |                     |
| Sample temperature (°C)                           | 22                                                                                                   |                     |
| Sample details                                    |                                                                                                      |                     |
| Proteins                                          | CpE                                                                                                  | CpE <sub>Tryp</sub> |
| Solvent composition                               | 10 mM HEPES pH 7.4, 100 mM NaCl, 2% glycerol                                                         |                     |
| Analysis statistics                               |                                                                                                      |                     |
| <i>Guinier analysis</i>                           |                                                                                                      |                     |
| <i>I</i> (0) (cm <sup>-1</sup> )                  | 0.00431 ± 0.000037                                                                                   | 0.0059 ± 0.000029   |
| <i>R</i> <sub>g</sub> (Å)                         | 27.46 ± 0.42                                                                                         | 26.02 ± 0.23        |
| <i>qR</i> <sub>g</sub> range                      | 0.28 – 1.29                                                                                          | 0.27 – 1.29         |
| Coefficient of correlation, <i>R</i> <sup>2</sup> | 0.90                                                                                                 | 0.96                |
| <i>P</i> ( <i>r</i> ) analysis                    |                                                                                                      |                     |
| <i>I</i> (0) (cm <sup>-1</sup> )                  | 0.00437 ± 0.000041                                                                                   | 0.00598 ± 0.000030  |
| <i>R</i> <sub>g</sub> (Å)                         | 28.92 ± 0.39                                                                                         | 27.4 ± 0.22         |
| <i>D</i> <sub>max</sub> (Å)                       | 102                                                                                                  | 95                  |
| Scattering particle size                          |                                                                                                      |                     |
| <i>Volume estimates</i>                           |                                                                                                      |                     |
| Porod volume (Å <sup>-3</sup> )                   | 50200                                                                                                | 35500               |
| <i>MW Estimates (kDa)</i>                         |                                                                                                      |                     |
| <i>V</i> <sub>c</sub> MW [3]                      | 34.4                                                                                                 | 26.7                |
| <i>V</i> <sub>p</sub> MW [4]                      | 41.7                                                                                                 | 29.5                |
| Bayesian MW (% confidence)<br>[5]                 | 35.8 – 39.8 (95.3%)                                                                                  | 27.9 – 31.3 (90.6%) |
| Shapes and size MW [6]                            | 37.8                                                                                                 | 30.0                |
| SASBDB ID                                         | SASDH9                                                                                               | SASDSJ9             |

**Table S3:  $R_g$  and  $D_{max}$  of EOM generated models of CpE**

| <b>Model</b>            | <b><math>R_g</math> (Å)</b> | <b><math>D_{max}</math> (Å)</b> |
|-------------------------|-----------------------------|---------------------------------|
| 1 (Salmon spheres)      | 27.00                       | 96.90                           |
| 2 (Yellow spheres)      | 29.40                       | 96.90                           |
| 3 (Magenta spheres)     | 27.10                       | 96.90                           |
| <b>4 (Blue spheres)</b> | <b>27.20</b>                | <b>103.30</b>                   |
| 5 (Cyan spheres)        | 29.00                       | 96.90                           |

**Table S4. Crystallographic data collection and refinement statistics**

|                                       | cCpE Dimer               | cCpE Tetramer            | CpE <sub>Tryp</sub>         |
|---------------------------------------|--------------------------|--------------------------|-----------------------------|
| Beamline                              | Beamline ALS 8.3.1       | Beamline ALS 8.3.1       | Beamline APS 23ID-B         |
| Wavelength (Å)                        | 1.11583                  | 1.11583                  | 1.033167                    |
| Space group                           | P 41 21 2                | P 21 21 21               | P 43 2 2                    |
| Cell dimensions                       |                          |                          |                             |
| a, b, c (Å)                           | 65.12, 65.12, 130.77     | 65.63, 64, 136.98        | 200.33, 200.33, 254.78      |
| α, β, γ (°)                           | 90, 90, 90               | 90, 90, 90               | 90, 90, 90                  |
| Resolution range (Å) <sup>a</sup>     | 19.7 - 1.6 (1.657 - 1.6) | 57.18 - 1.4 (1.45 - 1.4) | 66.78 - 2.32 (2.403 - 2.32) |
| Total reflections                     | 212098 (15496)           | 409546 (8980)            | 3129407 (242167)            |
| Unique reflections                    | 70024 (5197)             | 186626 (5803)            | 222147 (16289)              |
| Multiplicity                          | 1.73 (2.98)              | 2.19 (1.55)              | 14.09 (14.89)               |
| Completeness (%) <sup>b</sup>         | 99.52 (99.92)            | 88.96 (41.76)            | 99.62 (97.37)               |
| Mean I/SigmaI                         | 10.8 (0.42)              | 9.55 (0.29)              | 7.17 (0.39)                 |
| CC1/2                                 | 99.9 (12.7)              | 99.9 (12.5)              | 99.7 (11.8)                 |
| Wilson B factor                       | 28.04                    | 20.32                    | 64.65                       |
| R <sub>work</sub> / R <sub>free</sub> | 0.196/0.222              | 0.161/0.204              | 0.224/0.248                 |
| RMSD                                  |                          |                          |                             |
| Bond length (Å)                       | 0.014                    | 0.005                    | 0.004                       |
| Bond angle (°)                        | 1.47                     | 1.06                     | 0.95                        |
| Ramachandran (%)                      |                          |                          |                             |
| Favored                               | 98.33                    | 98.59                    | 97.15                       |
| Allowed                               | 1.67                     | 1.41                     | 2.76                        |
| Outliers                              | 0.00                     | 0.00                     | 0.09                        |
| Rotamer outliers                      | 0.00                     | 0.00                     | 0.40                        |
| Clash score                           | 11.67                    | 9.76                     | 14.22                       |
| Average B factors                     | 39.63                    | 28.74                    | 76.22                       |
| Molprobability score <sup>c</sup>     | 1.57                     | 1.52                     | 1.81                        |
| PDB ID <sup>d</sup>                   | 8U5D                     | 8U5E                     | 8U5F                        |

<sup>a</sup>Values in parenthesis are for highest resolution shell.<sup>b</sup>Percentage of correlation between intensities from random half-datasets. Correlation significant at the 0.1% level (CC1/2), as calculated by XDS [7].<sup>c</sup>As determined by <http://molprobability.biochem.duke.edu/>.<sup>d</sup>Deposition code in the Protein Data Bank.

**Movie S1: Structural Model of CpE<sub>Tryp</sub> Interface 1 Dimer Transition to Tetramer (Top View).**  
Structural morph depicting the conformational change from two CpE<sub>Tryp</sub> Interface 1 dimers to form the predicted tetramer.

**Movie S2: Structural Model of CpE<sub>Tryp</sub> Interface 1 Dimer Transition to Tetramer (Side View).**  
Structural morph depicting the conformational change from two CpE<sub>Tryp</sub> Interface 1 dimers to form the predicted tetramer.

## References

1. Tria, G.; Mertens, H.D.T.; Kachala, M.; Svergun, D.I. Advanced Ensemble Modelling of Flexible Macromolecules Using X-Ray Solution Scattering. *IUCrJ* **2015**, *2*, 207–217, doi:10.1107/S205225251500202X.
2. Bernadó, P.; Mylonas, E.; Petoukhov, M.V.; Blackledge, M.; Svergun, D.I. Structural Characterization of Flexible Proteins Using Small-Angle X-Ray Scattering. *J. Am. Chem. Soc.* **2007**, *129*, 5656–5664, doi:10.1021/ja069124n.
3. Rambo, R.P.; Tainer, J.A. Accurate Assessment of Mass, Models and Resolution by Small-Angle Scattering. *Nature* **2013**, *496*, 477–481, doi:10.1038/nature12070.
4. Piiadov, V.; Ares de Araújo, E.; Oliveira Neto, M.; Craievich, A.F.; Polikarpov, I. SAXSMoW 2.0: Online Calculator of the Molecular Weight of Proteins in Dilute Solution from Experimental SAXS Data Measured on a Relative Scale. *Protein Sci. Publ. Protein Soc.* **2019**, *28*, 454–463, doi:10.1002/pro.3528.
5. Hajizadeh, N.R.; Franke, D.; Jeffries, C.M.; Svergun, D.I. Consensus Bayesian Assessment of Protein Molecular Mass from Solution X-Ray Scattering Data. *Sci. Rep.* **2018**, *8*, 7204, doi:10.1038/s41598-018-25355-2.
6. Franke, D.; Jeffries, C.M.; Svergun, D.I. Machine Learning Methods for X-Ray Scattering Data Analysis from Biomacromolecular Solutions. *Biophys. J.* **2018**, *114*, 2485–2492, doi:10.1016/j.bpj.2018.04.018.
7. Kabsch, W. XDS. *Acta Crystallogr. D Biol. Crystallogr.* **2010**, *66*, 125–132, doi:10.1107/S0907444909047337.
